# Supplementary material for: Changes in Exosomal miRNA Composition in Thyroid Cancer Cells after Prolonged Exposure to Real Microgravity in Space
Source: MDPI journal article supplement (doi:10.3390/ijms222312841), 2021-11-27
Supplement: s1 [file s1]

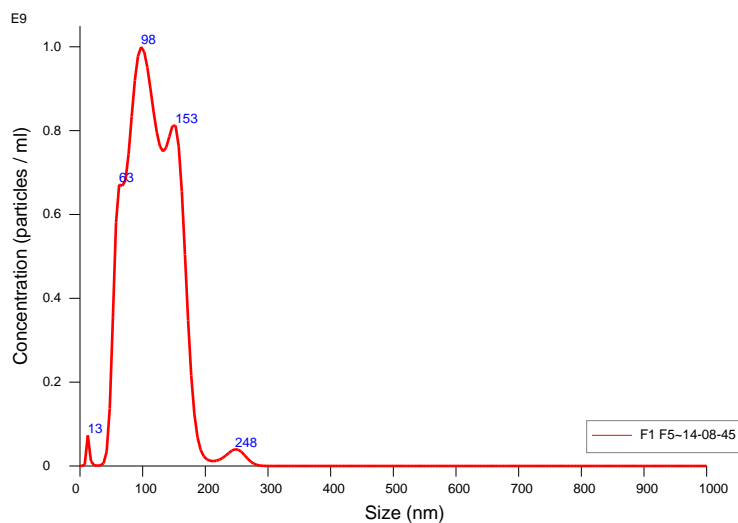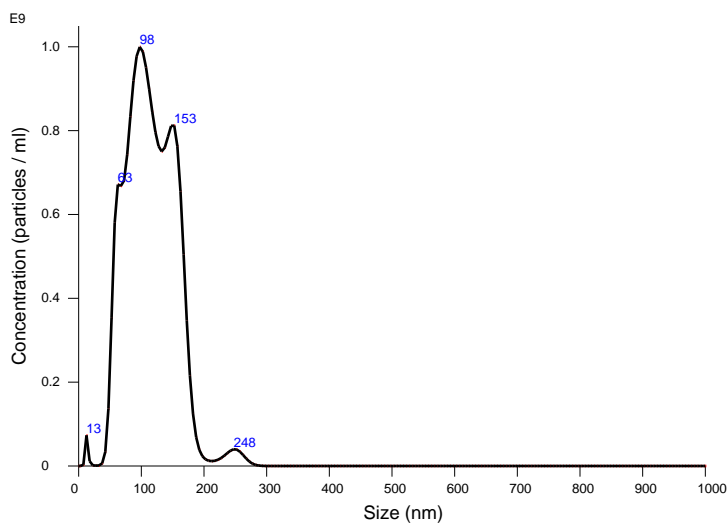

Error bars indicate + / - 1 standard error of the mean

### Included Files

F1 F5 2021-09-16 14-08-45

### Details

NTA Version: NTA 3.4 Build 3.4.003  
 Script Used: SOP Standard Measurement 02-08-03PM 16Sep2021.txt  
 Time Captured: 14:08:03 16/09/2021  
 Operator:  
 Pre-treatment:  
 Sample Name:  
 Diluent:  
 Remarks:

### Capture Settings

Camera Type: sCMOS  
 Laser Type: Green  
 Camera Level: 14  
 Slider Shutter: 1259  
 Slider Gain: 366  
 FPS: 25.0  
 Number of Frames: 749  
 Temperature: 21.7 °C  
 Viscosity: (Water) 1.0 cP  
 Dilution factor: 1 x 10e2  
 Syringe Pump Speed: 25

### Analysis Settings

Detect Threshold: 7  
 Blur Size: Auto  
 Max Jump Distance: Auto: 24.5 pix

### Results

Stats: Merged Data

Mean: 114.9 nm  
 Mode: 98.3 nm  
 SD: 38.9 nm  
 D10: 65.9 nm  
 D50: 111.9 nm  
 D90: 162.6 nm

Stats: Mean +/- Standard Error

Mean: 114.9 +/- 0.0 nm  
 Mode: 98.3 +/- 0.0 nm  
 SD: 38.9 +/- 0.0 nm  
 D10: 65.9 +/- 0.0 nm  
 D50: 111.9 +/- 0.0 nm  
 D90: 162.6 +/- 0.0 nm  
 Concentration: 2.00e+10 +/- 0.00e+00 particles/ml  
 10.9 +/- 0.0 particles/frame  
 15.9 +/- 0.0 centres/frame

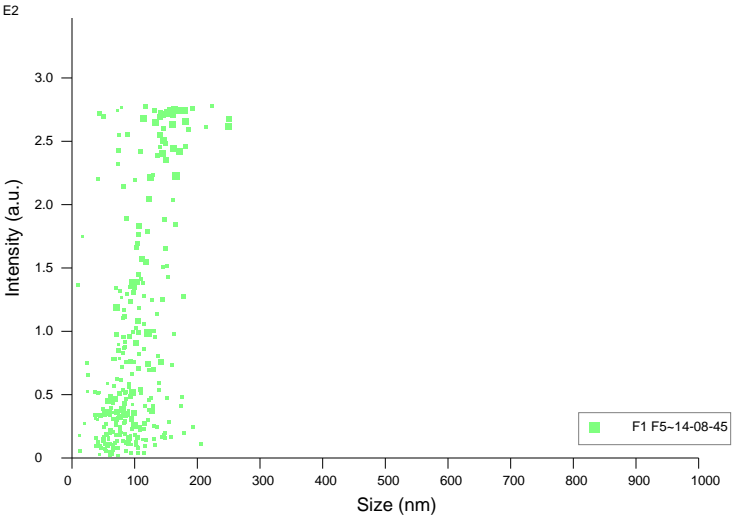

Intensity / Size graph for Experiment:  
F1 F5 2021-09-16 14-08-03

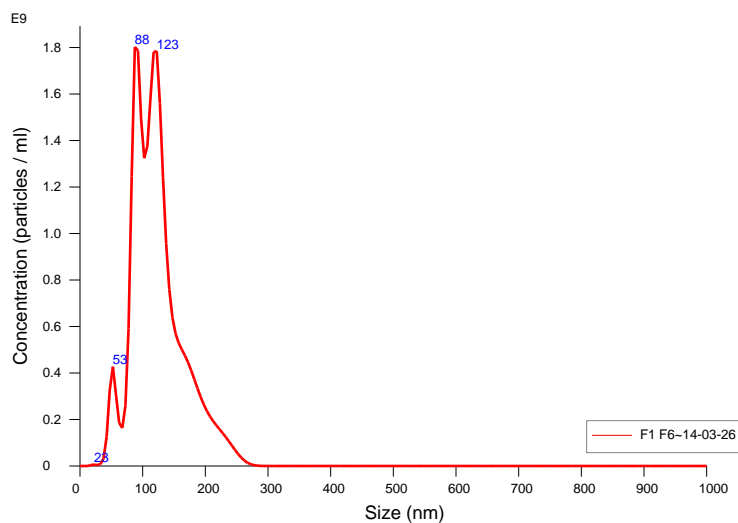

FTLA Concentration / Size graph for Experiment:  
F1 F6 2021-09-16 14-02-43

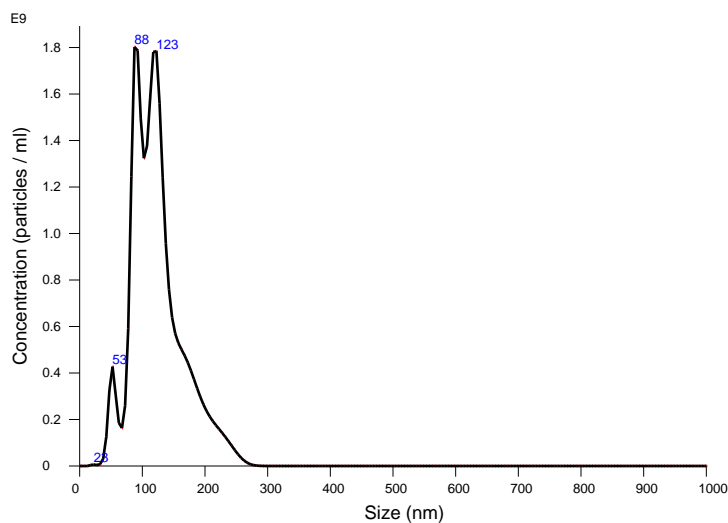

Averaged FTLA Concentration / Size for Experiment:  
F1 F6 2021-09-16 14-02-43  
Error bars indicate + / - 1 standard error of the mean

### Included Files

F1 F6 2021-09-16 14-03-26

### Details

NTA Version: NTA 3.4 Build 3.4.003  
Script Used: SOP Standard Measurement 02-02-43PM 16Sep2021.txt  
Time Captured: 14:02:43 16/09/2021  
Operator:  
Pre-treatment:  
Sample Name:  
Diluent:  
Remarks:

### Capture Settings

Camera Type: sCMOS  
Laser Type: Green  
Camera Level: 14  
Slider Shutter: 1259  
Slider Gain: 366  
FPS: 25.0  
Number of Frames: 749  
Temperature: 21.5 °C  
Viscosity: (Water) 1.0 cP  
Dilution factor: 1 x 10e2  
Syringe Pump Speed: 25

### Analysis Settings

Detect Threshold: 7  
Blur Size: Auto  
Max Jump Distance: Auto: 22.0 pix

### Results

#### Stats: Merged Data

Mean: 123.0 nm  
Mode: 89.9 nm  
SD: 41.0 nm  
D10: 81.3 nm  
D50: 117.1 nm  
D90: 182.0 nm

#### Stats: Mean +/- Standard Error

Mean: 123.0 +/- 0.0 nm  
Mode: 89.9 +/- 0.0 nm  
SD: 41.0 +/- 0.0 nm  
D10: 81.3 +/- 0.0 nm  
D50: 117.1 +/- 0.0 nm  
D90: 182.0 +/- 0.0 nm  
Concentration: 2.76e+10 +/- 0.00e+00 particles/ml  
15.1 +/- 0.0 particles/frame  
17.6 +/- 0.0 centres/frame

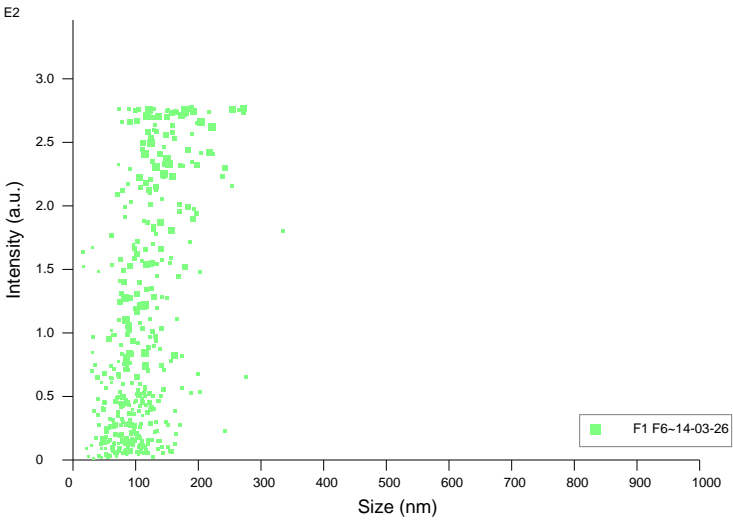

Intensity / Size graph for Experiment:  
F1 F6 2021-09-16 14-02-43

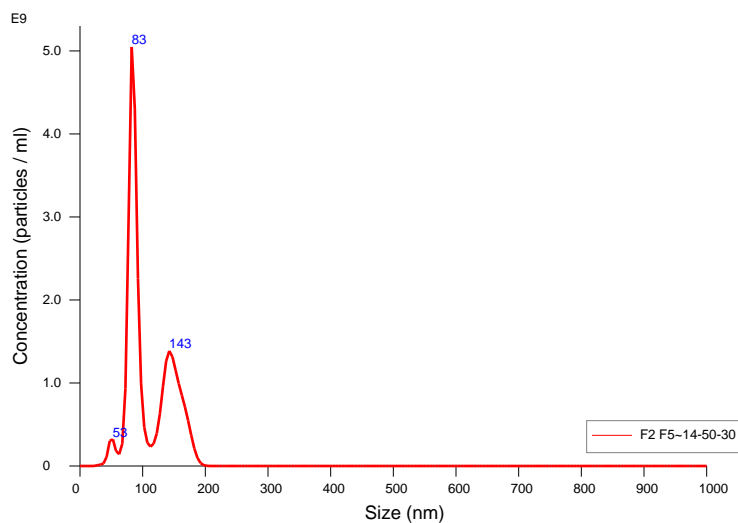

FTLA Concentration / Size graph for Experiment:  
F2 F5 2021-09-16 14-49-47

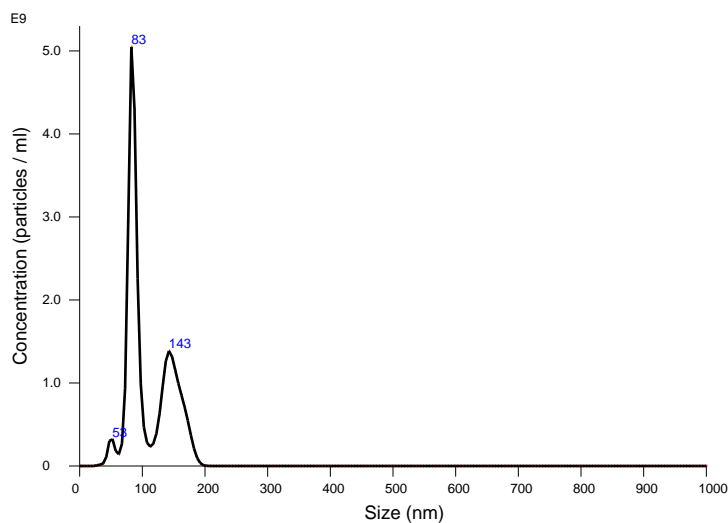

Averaged FTLA Concentration / Size for Experiment:  
F2 F5 2021-09-16 14-49-47  
Error bars indicate + / - 1 standard error of the mean

### Included Files

F2 F5 2021-09-16 14-50-30

### Details

NTA Version: NTA 3.4 Build 3.4.003  
Script Used: SOP Standard Measurement 02-49-47PM 16Sep2021.txt  
Time Captured: 14:49:47 16/09/2021  
Operator:  
Pre-treatment:  
Sample Name:  
Diluent:  
Remarks:

### Capture Settings

Camera Type: sCMOS  
Laser Type: Green  
Camera Level: 14  
Slider Shutter: 1259  
Slider Gain: 366  
FPS: 25.0  
Number of Frames: 749  
Temperature: 22.6 °C  
Viscosity: (Water) 0.9 cP  
Dilution factor: 1 x 10e2  
Syringe Pump Speed: 25

### Analysis Settings

Detect Threshold: 7  
Blur Size: Auto  
Max Jump Distance: Auto: 23.1 pix

### Results

#### Stats: Merged Data

Mean: 107.9 nm  
Mode: 83.7 nm  
SD: 34.3 nm  
D10: 76.2 nm  
D50: 90.9 nm  
D90: 159.1 nm

#### Stats: Mean +/- Standard Error

Mean: 107.9 +/- 0.0 nm  
Mode: 83.7 +/- 0.0 nm  
SD: 34.3 +/- 0.0 nm  
D10: 76.2 +/- 0.0 nm  
D50: 90.9 +/- 0.0 nm  
D90: 159.1 +/- 0.0 nm  
Concentration: 3.00e+10 +/- 0.00e+00 particles/ml  
16.4 +/- 0.0 particles/frame  
19.0 +/- 0.0 centres/frame

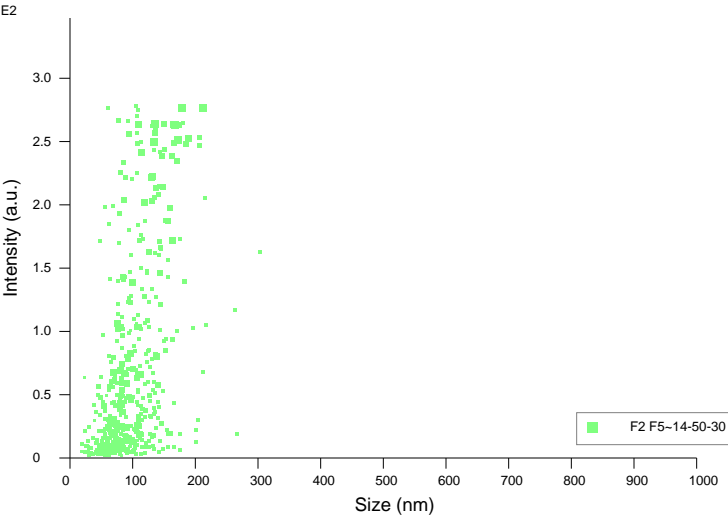

Intensity / Size graph for Experiment:  
F2 F5 2021-09-16 14-49-47

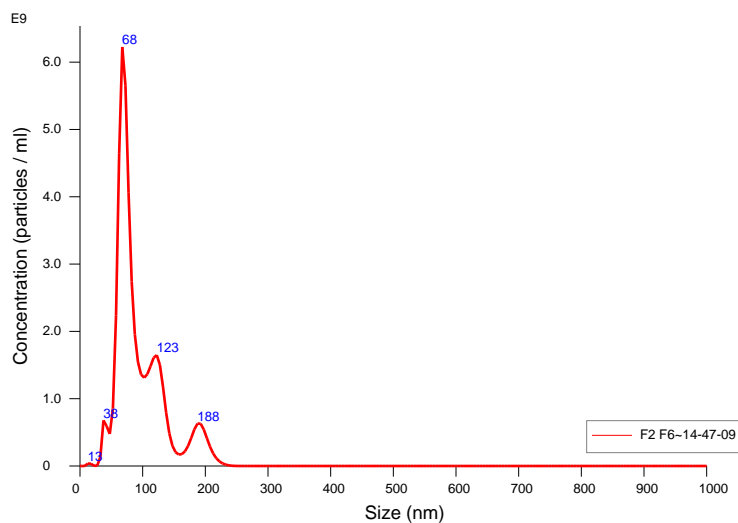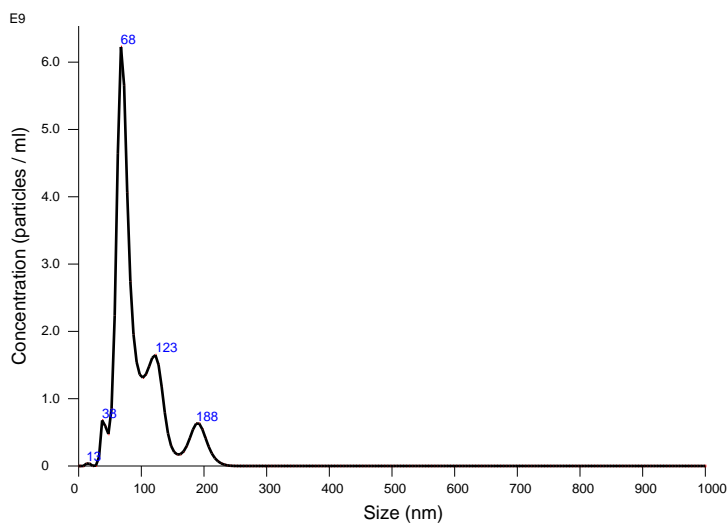

Error bars indicate + / - 1 standard error of the mean

### Included Files

F2 F6 2021-09-16 14-47-09

### Details

NTA Version: NTA 3.4 Build 3.4.003  
Script Used: SOP Standard Measurement 02-46-27PM 16Sep2021.txt  
Time Captured: 14:46:27 16/09/2021  
Operator:  
Pre-treatment:  
Sample Name:  
Diluent:  
Remarks:

### Capture Settings

Camera Type: sCMOS  
Laser Type: Green  
Camera Level: 14  
Slider Shutter: 1259  
Slider Gain: 366  
FPS: 25.0  
Number of Frames: 749  
Temperature: 22.6 °C  
Viscosity: (Water) 0.9 cP  
Dilution factor: 1 x 10e2  
Syringe Pump Speed: 25

### Analysis Settings

Detect Threshold: 7  
Blur Size: Auto  
Max Jump Distance: Auto: 23.2 pix

### Results

#### Stats: Merged Data

Mean: 94.3 nm  
Mode: 68.7 nm  
SD: 39.7 nm  
D10: 59.9 nm  
D50: 79.1 nm  
D90: 149.8 nm

#### Stats: Mean +/- Standard Error

Mean: 94.3 +/- 0.0 nm  
Mode: 68.7 +/- 0.0 nm  
SD: 39.7 +/- 0.0 nm  
D10: 59.9 +/- 0.0 nm  
D50: 79.1 +/- 0.0 nm  
D90: 149.8 +/- 0.0 nm  
Concentration: 4.99e+10 +/- 0.00e+00 particles/ml  
27.2 +/- 0.0 particles/frame  
31.2 +/- 0.0 centres/frame

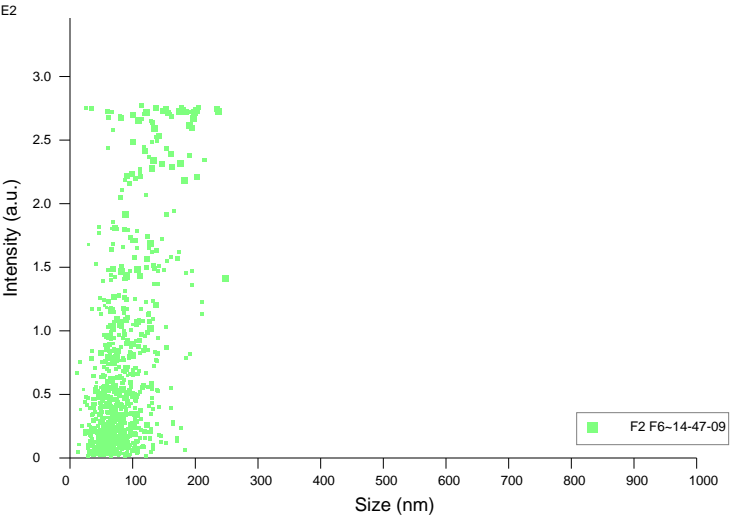

Intensity / Size graph for Experiment:  
F2 F6 2021-09-16 14-46-27



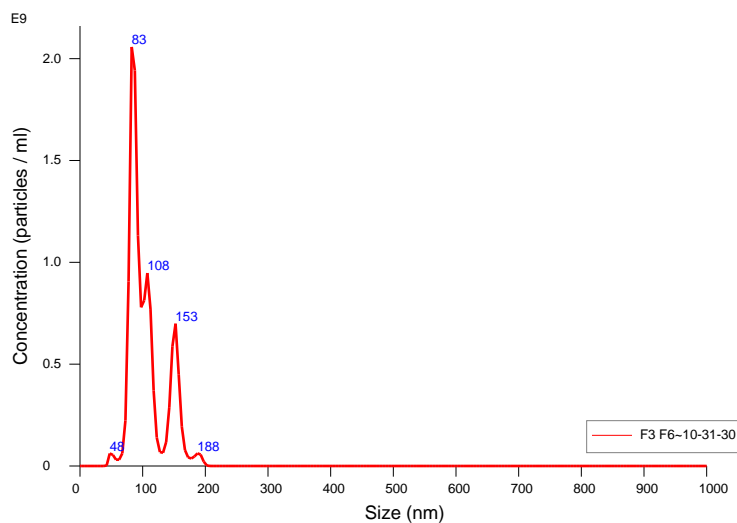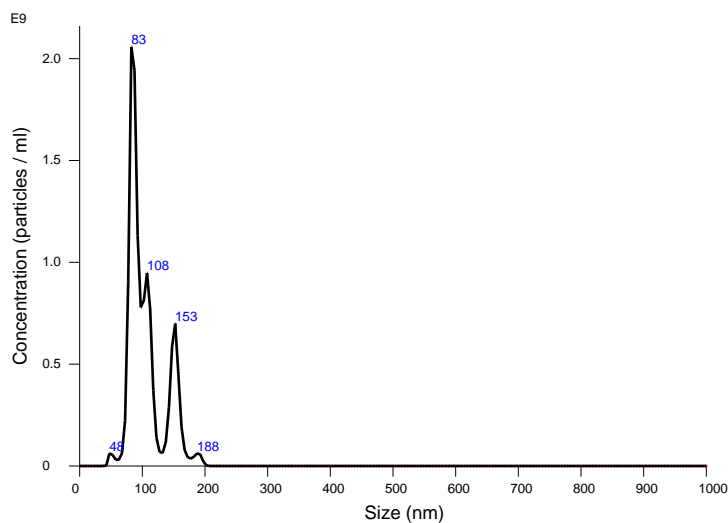

Error bars indicate + / - 1 standard error of the mean

### Included Files

F3 F6 2021-06-22 10-31-30

### Details

NTA Version: NTA 3.4 Build 3.4.003  
Script Used: SOP Standard Measurement 10-30-49AM 22Jun2021.txt  
Time Captured: 10:30:49 22/06/2021  
Operator:  
Pre-treatment:  
Sample Name:  
Diluent:  
Remarks:

### Capture Settings

Camera Type: sCMOS  
Laser Type: Green  
Camera Level: 14  
Slider Shutter: 1259  
Slider Gain: 366  
FPS: 25.0  
Number of Frames: 749  
Temperature: 23.6 °C  
Viscosity: (Water) 0.9 cP  
Dilution factor: 1 x 10e2  
Syringe Pump Speed: 25

### Analysis Settings

Detect Threshold: 7  
Blur Size: Auto  
Max Jump Distance: Auto: 14.2 pix

### Results

#### Stats: Merged Data

Mean: 105.5 nm  
Mode: 84.5 nm  
SD: 28.5 nm  
D10: 79.7 nm  
D50: 95.4 nm  
D90: 152.7 nm

#### Stats: Mean +/- Standard Error

Mean: 105.5 +/- 0.0 nm  
Mode: 84.5 +/- 0.0 nm  
SD: 28.5 +/- 0.0 nm  
D10: 79.7 +/- 0.0 nm  
D50: 95.4 +/- 0.0 nm  
D90: 152.7 +/- 0.0 nm  
Concentration: 1.31e+10 +/- 0.00e+00 particles/ml  
7.2 +/- 0.0 particles/frame  
9.1 +/- 0.0 centres/frame

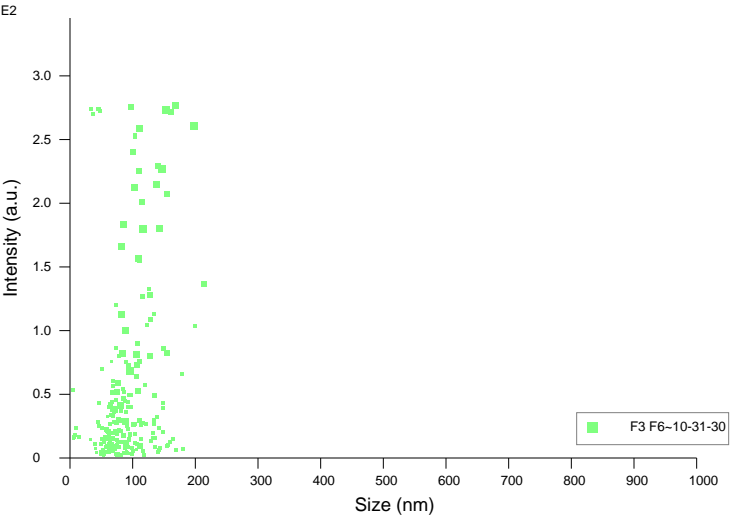

Intensity / Size graph for Experiment:  
F3 F6 2021-06-22 10-30-49

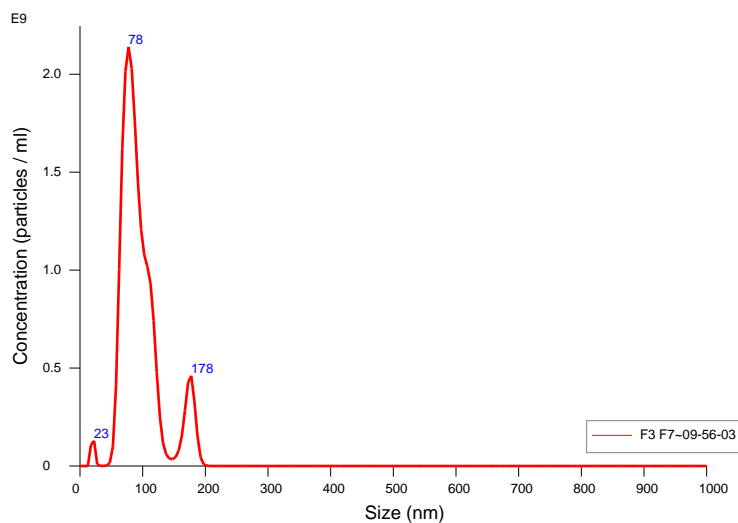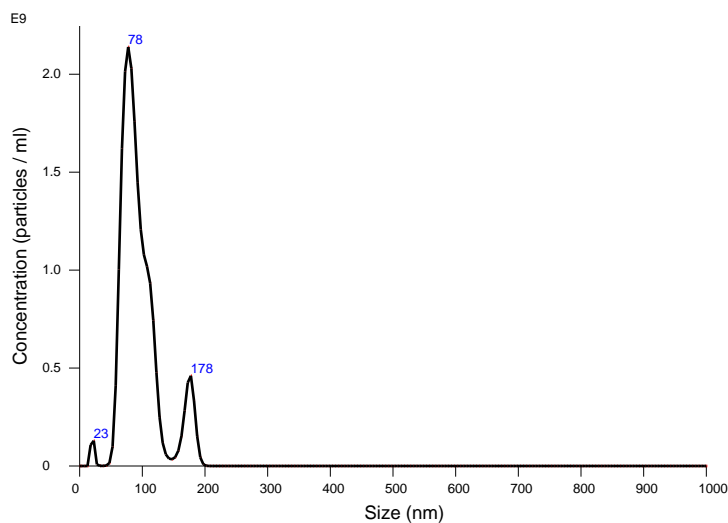

### Included Files

F3 F7 2021-06-22 09-56-03

### Details

NTA Version: NTA 3.4 Build 3.4.003  
Script Used: SOP Standard Measurement 09-55-20AM 22Jun2021.txt  
Time Captured: 09:55:20 22/06/2021  
Operator:  
Pre-treatment:  
Sample Name:  
Diluent:  
Remarks:

### Capture Settings

Camera Type: sCMOS  
Laser Type: Green  
Camera Level: 14  
Slider Shutter: 1259  
Slider Gain: 366  
FPS: 25.0  
Number of Frames: 749  
Temperature: 21.9 °C  
Viscosity: (Water) 1.0 cP  
Dilution factor: 1 x 10e2  
Syringe Pump Speed: 25

### Analysis Settings

Detect Threshold: 7  
Blur Size: Auto  
Max Jump Distance: Auto: 27.9 pix

### Results

Stats: Merged Data

Mean: 95.3 nm  
Mode: 77.7 nm  
SD: 32.0 nm  
D10: 65.9 nm  
D50: 87.2 nm  
D90: 138.7 nm

Stats: Mean +/- Standard Error

Mean: 95.3 +/- 0.0 nm  
Mode: 77.7 +/- 0.0 nm  
SD: 32.0 +/- 0.0 nm  
D10: 65.9 +/- 0.0 nm  
D50: 87.2 +/- 0.0 nm  
D90: 138.7 +/- 0.0 nm  
Concentration: 2.07e+10 +/- 0.00e+00 particles/ml  
11.3 +/- 0.0 particles/frame  
14.0 +/- 0.0 centres/frame

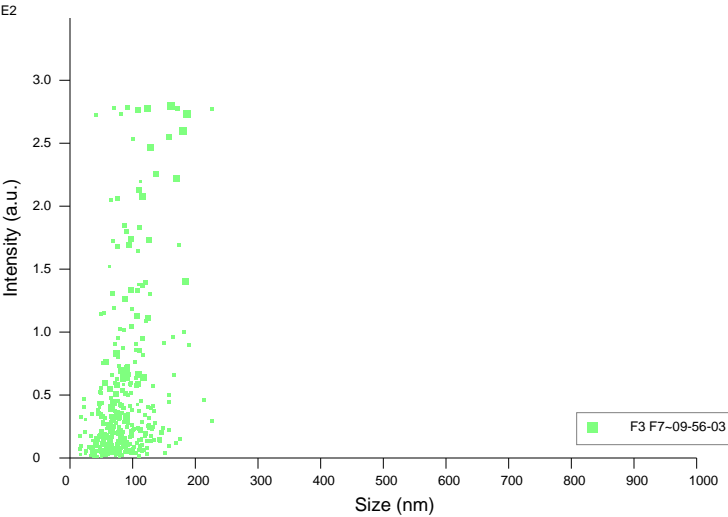

Intensity / Size graph for Experiment:  
F3 F7 2021-06-22 09-55-20

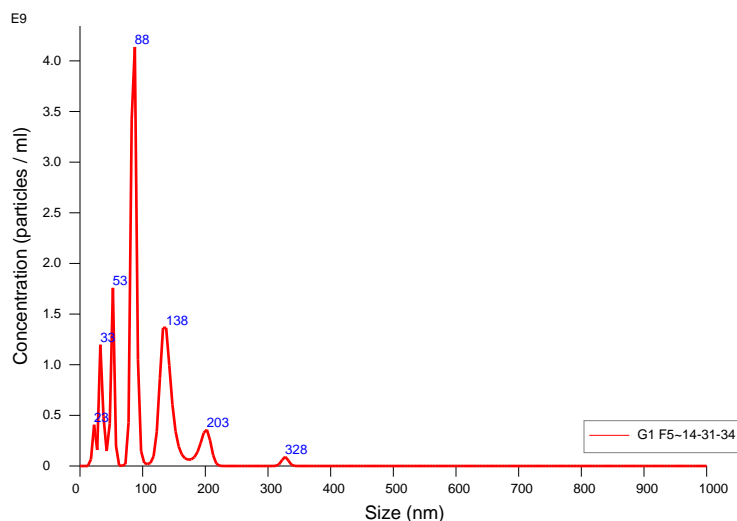

FTLA Concentration / Size graph for Experiment:  
G1 F5 2021-09-16 14-30-52

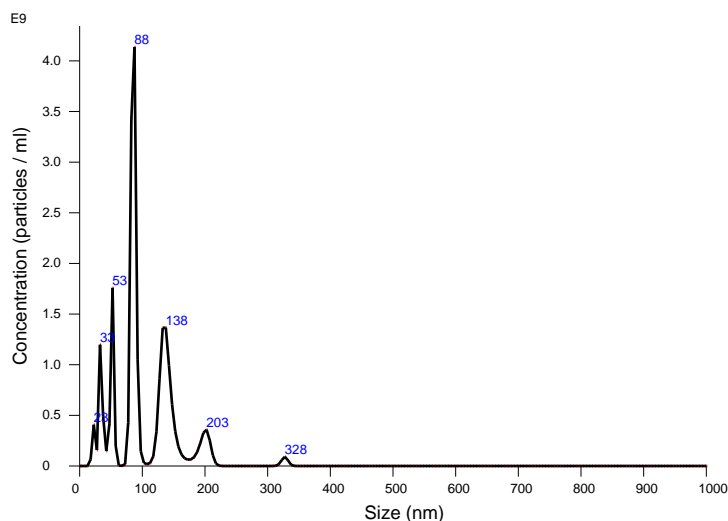

Averaged FTLA Concentration / Size for Experiment:  
G1 F5 2021-09-16 14-30-52  
Error bars indicate + / - 1 standard error of the mean

### Included Files

G1 F5 2021-09-16 14-31-34

### Details

NTA Version: NTA 3.4 Build 3.4.003  
Script Used: SOP Standard Measurement 02-30-52PM 16Sep2021.txt  
Time Captured: 14:30:52 16/09/2021  
Operator:  
Pre-treatment:  
Sample Name:  
Diluent:  
Remarks:

### Capture Settings

Camera Type: sCMOS  
Laser Type: Green  
Camera Level: 14  
Slider Shutter: 1259  
Slider Gain: 366  
FPS: 25.0  
Number of Frames: 749  
Temperature: 22.3 °C  
Viscosity: (Water) 0.9 cP  
Dilution factor: 1 x 10e2  
Syringe Pump Speed: 25

### Analysis Settings

Detect Threshold: 7  
Blur Size: Auto  
Max Jump Distance: Auto: 22.8 pix

### Results

#### Stats: Merged Data

Mean: 101.9 nm  
Mode: 85.9 nm  
SD: 50.3 nm  
D10: 39.2 nm  
D50: 88.0 nm  
D90: 155.9 nm

#### Stats: Mean +/- Standard Error

Mean: 101.9 +/- 0.0 nm  
Mode: 85.9 +/- 0.0 nm  
SD: 50.3 +/- 0.0 nm  
D10: 39.2 +/- 0.0 nm  
D50: 88.0 +/- 0.0 nm  
D90: 155.9 +/- 0.0 nm  
Concentration: 2.24e+10 +/- 0.00e+00 particles/ml  
12.2 +/- 0.0 particles/frame  
15.9 +/- 0.0 centres/frame

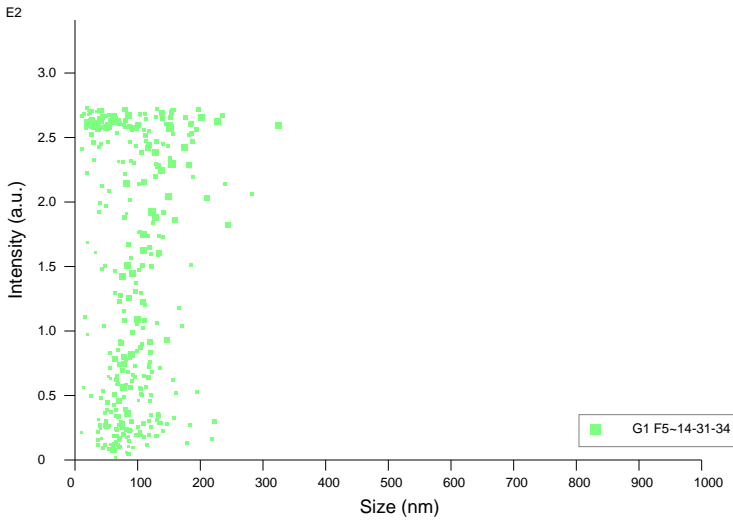

Intensity / Size graph for Experiment:  
G1 F5 2021-09-16 14-30-52

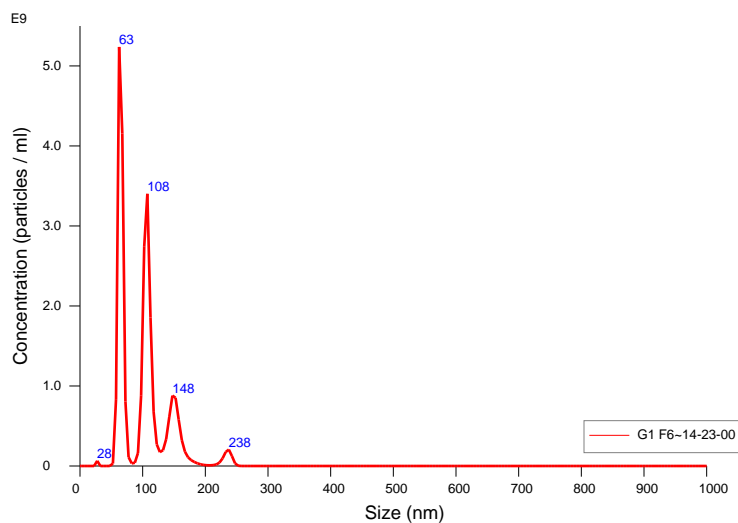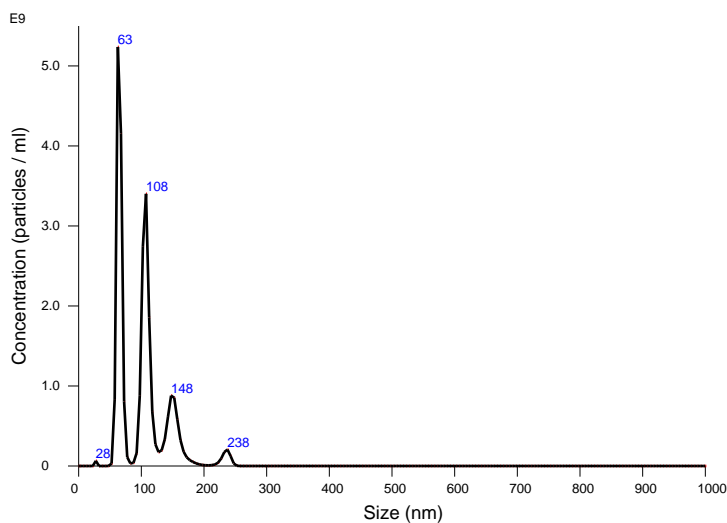

Error bars indicate + / - 1 standard error of the mean

### Included Files

G1 F6 2021-09-16 14-23-00

### Details

NTA Version: NTA 3.4 Build 3.4.003  
Script Used: SOP Standard Measurement 02-22-18PM 16Sep2021.txt  
Time Captured: 14:22:18 16/09/2021  
Operator:  
Pre-treatment:  
Sample Name:  
Diluent:  
Remarks:

### Capture Settings

Camera Type: sCMOS  
Laser Type: Green  
Camera Level: 14  
Slider Shutter: 1259  
Slider Gain: 366  
FPS: 25.0  
Number of Frames: 749  
Temperature: 22.0 °C  
Viscosity: (Water) 1.0 cP  
Dilution factor: 1 x 10e2  
Syringe Pump Speed: 25

### Analysis Settings

Detect Threshold: 7  
Blur Size: Auto  
Max Jump Distance: Auto: 24.3 pix

### Results

Stats: Merged Data

Mean: 99.8 nm  
Mode: 64.0 nm  
SD: 39.1 nm  
D10: 61.6 nm  
D50: 101.6 nm  
D90: 151.8 nm

Stats: Mean +/- Standard Error

Mean: 99.8 +/- 0.0 nm  
Mode: 64.0 +/- 0.0 nm  
SD: 39.1 +/- 0.0 nm  
D10: 61.6 +/- 0.0 nm  
D50: 101.6 +/- 0.0 nm  
D90: 151.8 +/- 0.0 nm  
Concentration: 2.65e+10 +/- 0.00e+00 particles/ml  
14.5 +/- 0.0 particles/frame  
17.2 +/- 0.0 centres/frame

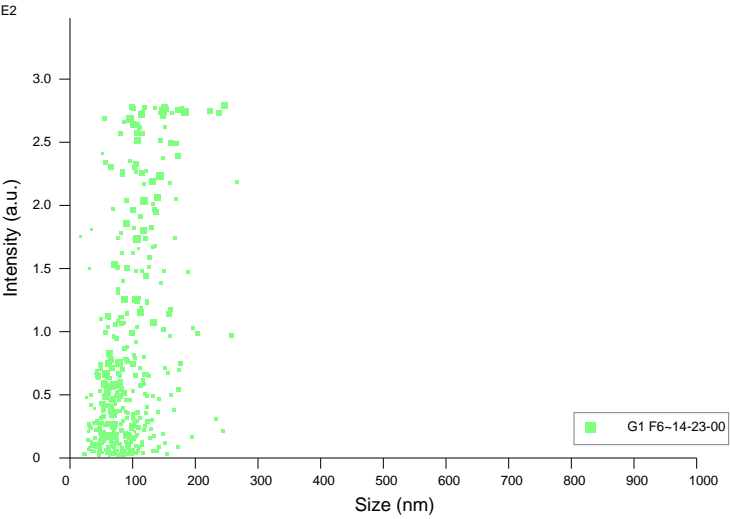

Intensity / Size graph for Experiment:  
G1 F6 2021-09-16 14-22-18



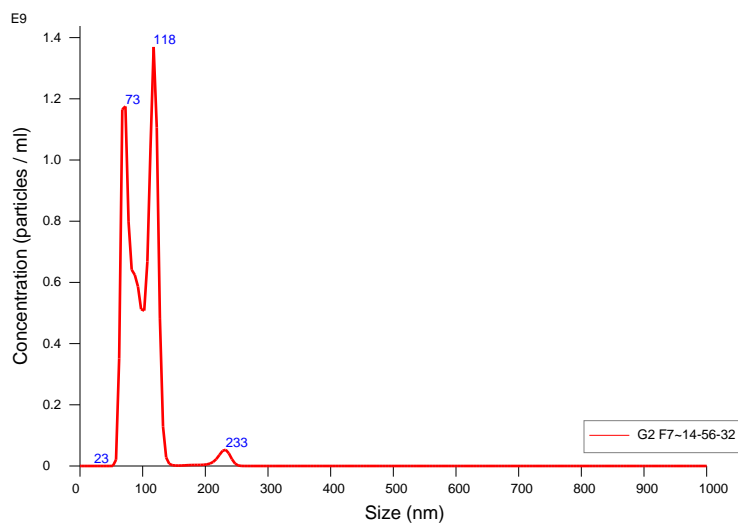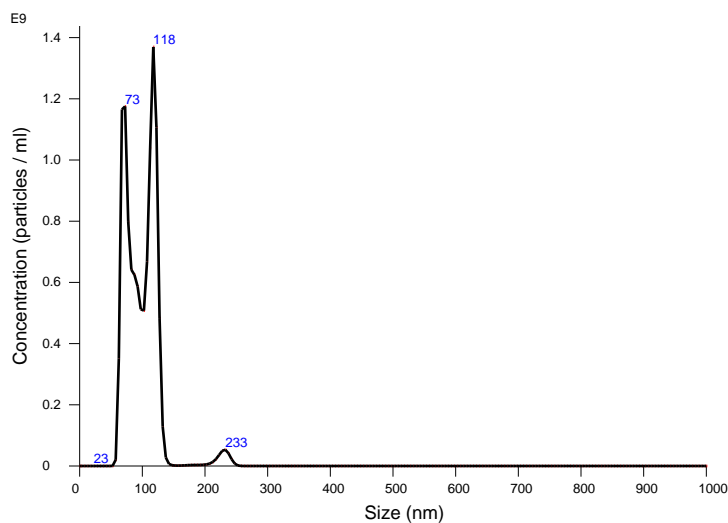

Error bars indicate + / - 1 standard error of the mean

### Included Files

G2 F7 2021-09-16 14-56-32

### Details

NTA Version: NTA 3.4 Build 3.4.003  
Script Used: SOP Standard Measurement 02-55-50PM 16Sep2021.txt  
Time Captured: 14:55:50 16/09/2021  
Operator:  
Pre-treatment:  
Sample Name:  
Diluent:  
Remarks:

### Capture Settings

Camera Type: sCMOS  
Laser Type: Green  
Camera Level: 14  
Slider Shutter: 1259  
Slider Gain: 366  
FPS: 25.0  
Number of Frames: 749  
Temperature: 22.7 °C  
Viscosity: (Water) 0.9 cP  
Dilution factor: 1 x 10e2  
Syringe Pump Speed: 25

### Analysis Settings

Detect Threshold: 7  
Blur Size: Auto  
Max Jump Distance: Auto: 14.2 pix

### Results

#### Stats: Merged Data

Mean: 99.6 nm  
Mode: 117.8 nm  
SD: 29.0 nm  
D10: 68.3 nm  
D50: 98.8 nm  
D90: 124.0 nm

#### Stats: Mean +/- Standard Error

Mean: 99.6 +/- 0.0 nm  
Mode: 117.8 +/- 0.0 nm  
SD: 29.0 +/- 0.0 nm  
D10: 68.3 +/- 0.0 nm  
D50: 98.8 +/- 0.0 nm  
D90: 124.0 +/- 0.0 nm  
Concentration: 1.15e+10 +/- 0.00e+00 particles/ml  
6.3 +/- 0.0 particles/frame  
8.0 +/- 0.0 centres/frame

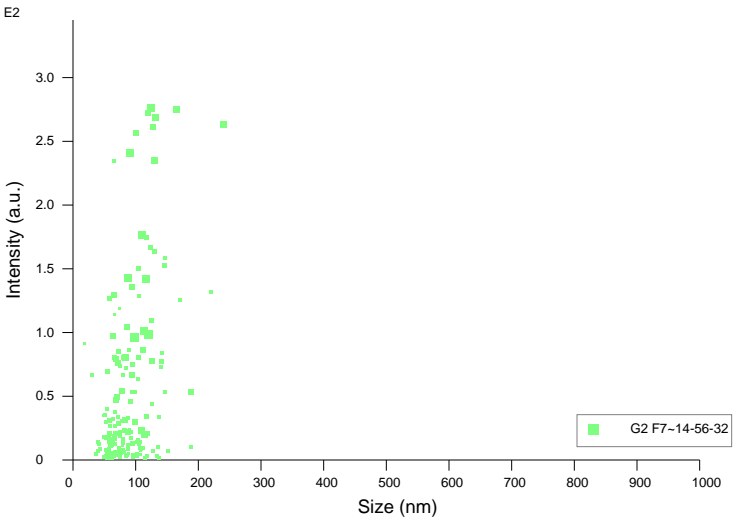

Intensity / Size graph for Experiment:  
G2 F7 2021-09-16 14-55-50

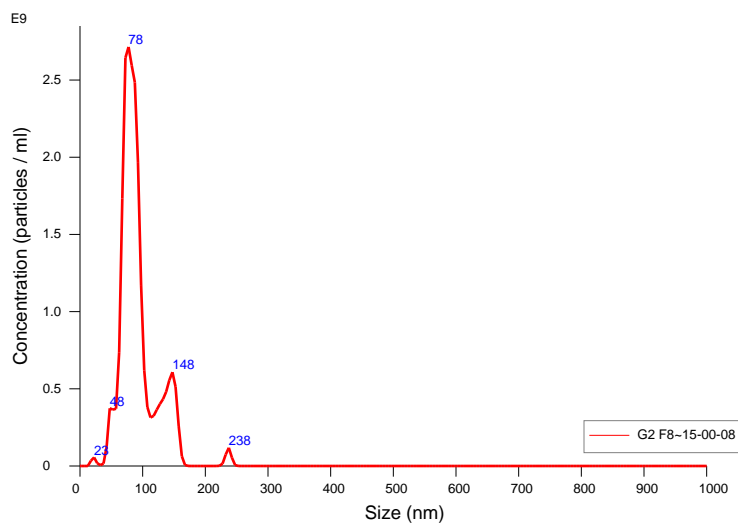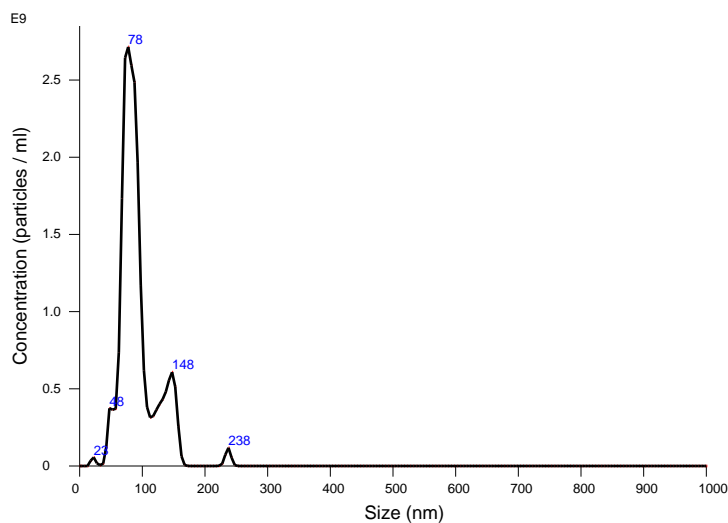

Error bars indicate + / - 1 standard error of the mean

### Included Files

G2 F8 2021-09-16 15-00-08

### Details

NTA Version: NTA 3.4 Build 3.4.003  
Script Used: SOP Standard Measurement 02-59-27PM 16Sep2021.txt  
Time Captured: 14:59:27 16/09/2021  
Operator:  
Pre-treatment:  
Sample Name:  
Diluent:  
Remarks:

### Capture Settings

Camera Type: sCMOS  
Laser Type: Green  
Camera Level: 14  
Slider Shutter: 1259  
Slider Gain: 366  
FPS: 25.0  
Number of Frames: 749  
Temperature: 22.7 °C  
Viscosity: (Water) 0.9 cP  
Dilution factor: 1 x 10e2  
Syringe Pump Speed: 25

### Analysis Settings

Detect Threshold: 7  
Blur Size: Auto  
Max Jump Distance: Auto: 25.5 pix

### Results

#### Stats: Merged Data

Mean: 92.1 nm  
Mode: 76.9 nm  
SD: 30.6 nm  
D10: 65.6 nm  
D50: 84.5 nm  
D90: 139.7 nm

#### Stats: Mean +/- Standard Error

Mean: 92.1 +/- 0.0 nm  
Mode: 76.9 +/- 0.0 nm  
SD: 30.6 +/- 0.0 nm  
D10: 65.6 +/- 0.0 nm  
D50: 84.5 +/- 0.0 nm  
D90: 139.7 +/- 0.0 nm  
Concentration: 2.30e+10 +/- 0.00e+00 particles/ml  
12.6 +/- 0.0 particles/frame  
14.7 +/- 0.0 centres/frame

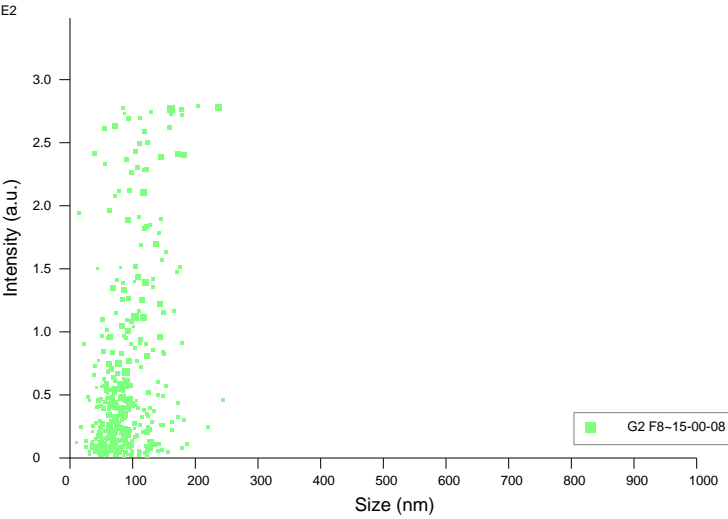

Intensity / Size graph for Experiment:  
G2 F8 2021-09-16 14-59-27

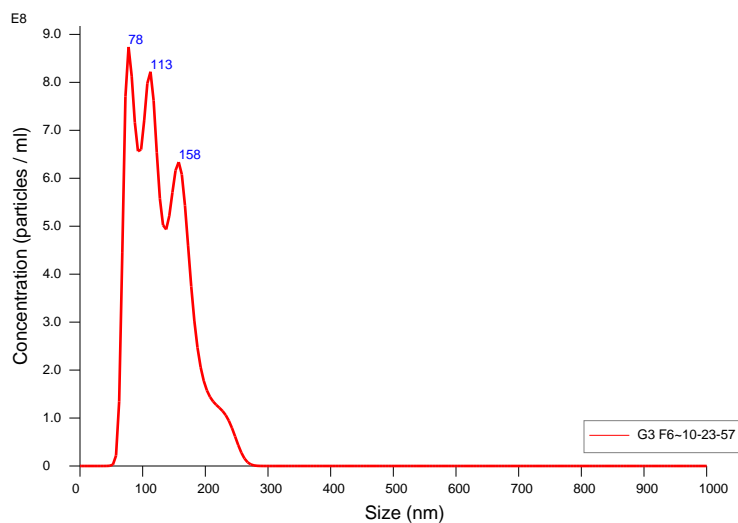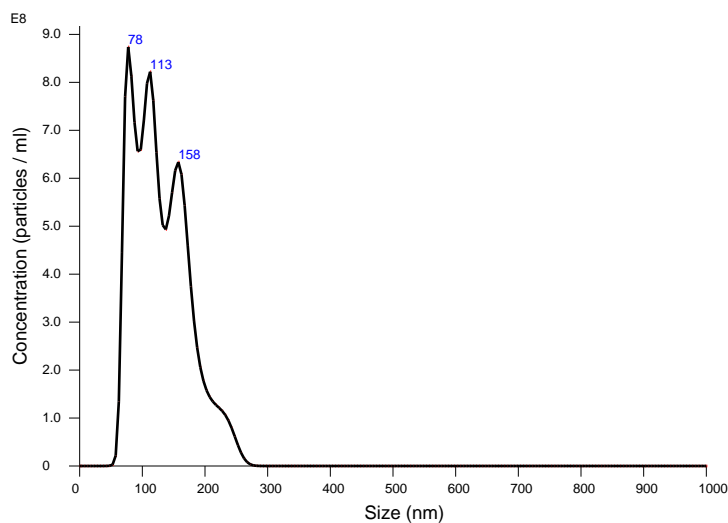

Error bars indicate + / - 1 standard error of the mean

### Included Files

G3 F6 2021-06-22 10-23-57

### Details

NTA Version: NTA 3.4 Build 3.4.003  
Script Used: SOP Standard Measurement 10-23-15AM 22Jun2021.txt  
Time Captured: 10:23:15 22/06/2021  
Operator:  
Pre-treatment:  
Sample Name:  
Diluent:  
Remarks:

### Capture Settings

Camera Type: sCMOS  
Laser Type: Green  
Camera Level: 14  
Slider Shutter: 1259  
Slider Gain: 366  
FPS: 25.0  
Number of Frames: 749  
Temperature: 23.3 °C  
Viscosity: (Water) 0.9 cP  
Dilution factor: 1 x 10e2  
Syringe Pump Speed: 25

### Analysis Settings

Detect Threshold: 7  
Blur Size: Auto  
Max Jump Distance: Auto: 15.2 pix

### Results

#### Stats: Merged Data

Mean: 129.4 nm  
Mode: 78.2 nm  
SD: 43.8 nm  
D10: 76.8 nm  
D50: 122.0 nm  
D90: 188.7 nm

#### Stats: Mean +/- Standard Error

Mean: 129.4 +/- 0.0 nm  
Mode: 78.2 +/- 0.0 nm  
SD: 43.8 +/- 0.0 nm  
D10: 76.8 +/- 0.0 nm  
D50: 122.0 +/- 0.0 nm  
D90: 188.7 +/- 0.0 nm  
Concentration: 1.69e+10 +/- 0.00e+00 particles/ml  
9.2 +/- 0.0 particles/frame  
10.1 +/- 0.0 centres/frame

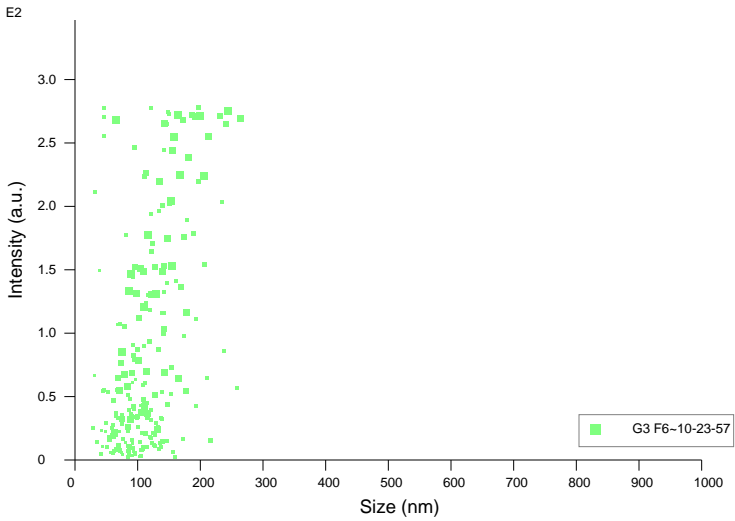

Intensity / Size graph for Experiment:  
G3 F6 2021-06-22 10-23-15

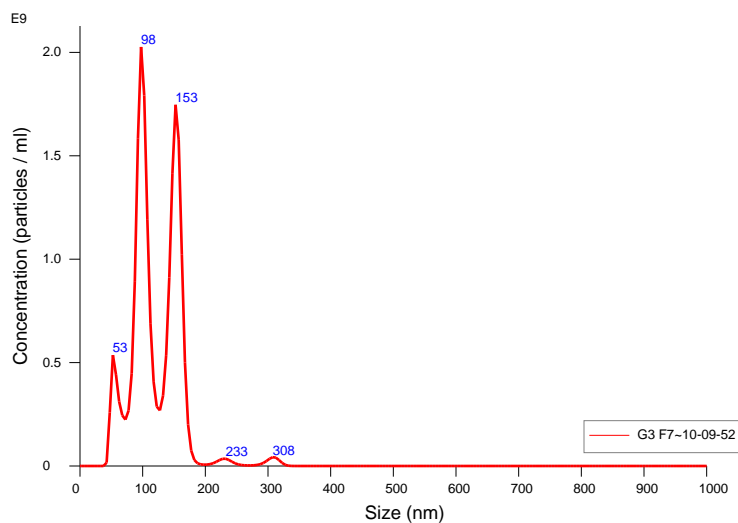

FTLA Concentration / Size graph for Experiment:  
G3 F7 2021-06-22 10-09-10

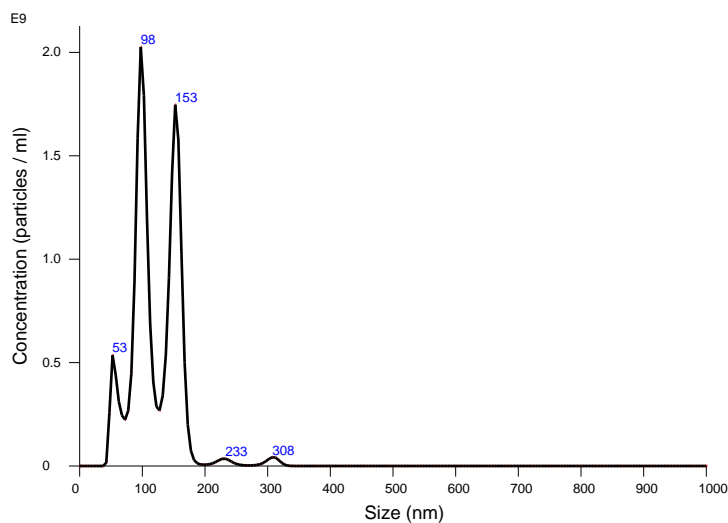

Averaged FTLA Concentration / Size for Experiment:  
G3 F7 2021-06-22 10-09-10  
Error bars indicate + / - 1 standard error of the mean

### Included Files

G3 F7 2021-06-22 10-09-52

### Details

NTA Version: NTA 3.4 Build 3.4.003  
Script Used: SOP Standard Measurement 10-09-10AM 22Jun2021.txt  
Time Captured: 10:09:10 22/06/2021  
Operator:  
Pre-treatment:  
Sample Name:  
Diluent:  
Remarks:

### Capture Settings

Camera Type: sCMOS  
Laser Type: Green  
Camera Level: 14  
Slider Shutter: 1259  
Slider Gain: 366  
FPS: 25.0  
Number of Frames: 749  
Temperature: 22.8 °C  
Viscosity: (Water) 0.9 cP  
Dilution factor: 1 x 10e2  
Syringe Pump Speed: 25

### Analysis Settings

Detect Threshold: 7  
Blur Size: Auto  
Max Jump Distance: Auto: 21.5 pix

### Results

#### Stats: Merged Data

Mean: 121.0 nm  
Mode: 98.3 nm  
SD: 40.2 nm  
D10: 75.8 nm  
D50: 110.9 nm  
D90: 161.2 nm

#### Stats: Mean +/- Standard Error

Mean: 121.0 +/- 0.0 nm  
Mode: 98.3 +/- 0.0 nm  
SD: 40.2 +/- 0.0 nm  
D10: 75.8 +/- 0.0 nm  
D50: 110.9 +/- 0.0 nm  
D90: 161.2 +/- 0.0 nm  
Concentration: 2.07e+10 +/- 0.00e+00 particles/ml  
11.3 +/- 0.0 particles/frame  
12.3 +/- 0.0 centres/frame

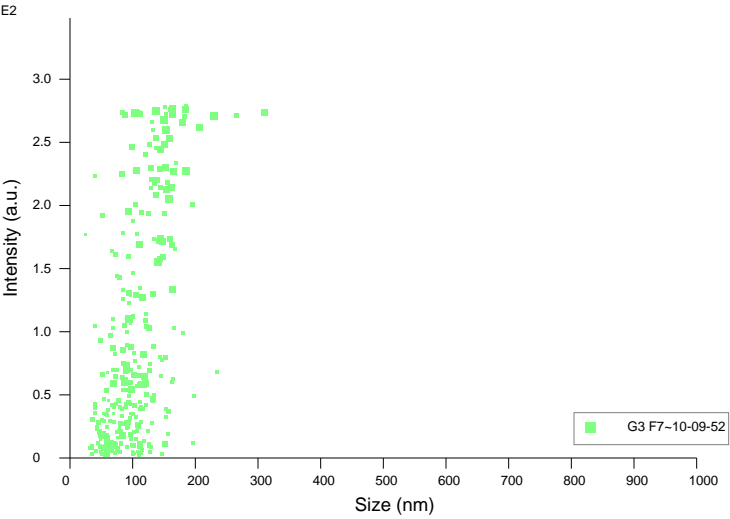

Intensity / Size graph for Experiment:  
G3 F7 2021-06-22 10-09-10
